# Supplementary material
Source: HighWire-hosted journal article supplement (https://bjgp.org/highwire/filestream/40337/field_highwire_adjunct_files/0/bjgp21X714245_suppl.pdf)
Supplement: bjgp21X714245_suppl.pdf [file bjgp21X714245_suppl.pdf]

**Table S1. The usage characteristics of supplements and drugs for other chronic diseases in different medication burden status.**

| <b>Drug<br/>n (%)</b>             | <b>Total<br/>n = 1761</b> | <b>Controls<br/>n= 123</b> | <b>Polypharmacy<br/>n = 661</b> | <b>Hyperpolyphar<br/>macy<br/>n = 632</b> | <b>Super<br/>hyperpolyphar<br/>macy<br/>n = 345</b> |
|-----------------------------------|---------------------------|----------------------------|---------------------------------|-------------------------------------------|-----------------------------------------------------|
| <b>Supplements</b>                |                           |                            |                                 |                                           |                                                     |
| Vitamin B                         | 107 (6.1)                 | 1 (0.8)                    | 16 (2.4)                        | 39 (6.2)                                  | 51 (14.8)                                           |
| Calcium                           | 296 (16.8)                | 0 (0)                      | 50 (7.6)                        | 123 (19.5)                                | 123 (35.7)                                          |
| Iron                              | 169 (9.6)                 | 0 (0)                      | 27 (4.1)                        | 71 (11.2)                                 | 71 (20.6)                                           |
| Glucosamine                       | 48 (2.7)                  | 0 (0)                      | 10 (1.5)                        | 16 (2.5)                                  | 22 (6.4)                                            |
| <b>COPD/Asthma</b>                |                           |                            |                                 |                                           |                                                     |
| Salbutamol                        | 240 (13.6)                | 0 (0)                      | 34 (5.1)                        | 94 (14.9)                                 | 112 (32.5)                                          |
| Montelukast                       | 41 (2.3)                  | 0 (0)                      | 1 (0.2)                         | 14 (2.2)                                  | 26 (7.5)                                            |
| Ipratropium                       | 77 (4.4)                  | 0 (0)                      | 12 (1.8)                        | 26 (4.1)                                  | 39 (11.3)                                           |
| <b>Thyroid diseases</b>           |                           |                            |                                 |                                           |                                                     |
| Levothyroxine                     | 277 (15.7)                | 2 (1.6)                    | 73 (11.0)                       | 131 (20.7)                                | 71 (20.6)                                           |
| Methimazole /<br>Propylthiouracil | 5 (0.3)                   | 0 (0)                      | 0 (0)                           | 2 (0.3)                                   | 3 (0.9)                                             |

**Table S2. Baseline Characteristics of the Echocardiography Cohort by total medication burden at baseline**

|                            | <b>Controls</b>  | <b>Polypharmacy</b> | <b>Hyperpolypharmacy</b> | <b>Super hyperpolypharmacy</b> | <b>P</b> |
|----------------------------|------------------|---------------------|--------------------------|--------------------------------|----------|
|                            | <b>n = 31</b>    | <b>n = 243</b>      | <b>n = 260</b>           | <b>n = 120</b>                 |          |
| Mean LV wall thickness, mm | 1.2 ± 0.2        | 1.2 ± 0.2           | 1.2 ± 0.2                | 1.2 ± 0.2                      | 0.08     |
| LVMi, g/m <sup>2</sup>     | 107 ± 33         | 109 ± 32            | 110 ± 30                 | 113 ± 30                       | 0.56     |
| LVEDVi, ml/m <sup>2</sup>  | 50 ± 18          | 47 ± 15             | 47 ± 13                  | 48 ± 13                        | 0.73     |
| LVESVi, ml/m <sup>2</sup>  | 22 ± 14          | 20 ± 9              | 19 ± 8                   | 19 ± 7                         | 0.26     |
| LVEF, %                    | 58 ± 10          | 59 ± 8              | 60 ± 8                   | 62 ± 7                         | 0.030    |
| Longitudinal strain, %     | -16.1 ± 4.2      | -15.5 ± 3.6         | -15.3 ± 3.5              | -15.8 ± 3.0                    | 0.73     |
| RVFAC, %                   | 49 ± 10          | 48 ± 8              | 49 ± 8                   | 49 ± 8                         | 0.84     |
| LAVi, ml                   | 29 ± 14          | 32 ± 13             | 31 ± 15                  | 30 ± 12                        | 0.40     |
| MR jet area/LA area        | 0.13 (0.00-0.17) | 0.06 (0.00-0.12)    | 0.04 (0.00-0.10)         | 0.09 (0.00-0.15)               | 0.08     |
| TR jet velocity, m/s       | 2.8 ± 0.5        | 2.8 ± 0.5           | 2.9 ± 0.5                | 2.7 ± 0.4                      | 0.26     |

Values are mean ± SD or median (interquartile range).

LA = left atrial; LAVi = left atrial volume index; LV = left ventricular; LVEDVi = left ventricular end-diastolic volume index; LVEF = left ventricular ejection fraction; LVESVi = left ventricular end systolic volume index; LVMi = left ventricular mass index; MR = mitral regurgitation, RVFAC = right ventricular fractional area change; TR = tricuspid regurgitation.

**Table S3. Event rates of the studied outcomes by total medication burden at baseline**

|                                  | <b>Events<br/>(n (%))</b> | <b>Event rates<br/>(per 100 person-yrs)</b> |
|----------------------------------|---------------------------|---------------------------------------------|
| <b>Primary Outcome*</b>          |                           |                                             |
| Controls (n=123)                 | 20 (16.3)                 | 6.3 (3.8-9.7)                               |
| Polypharmacy (n=661)             | 156 (23.6)                | 8.7 (7.4-10.2)                              |
| Hyperpolypharmacy (n=632)        | 207 (32.8)                | 12.5 (10.9-14.4)                            |
| Super hyperpolypharmacy (n=345)  | 138 (40.0)                | 16.8 (14.2-19.9)                            |
| <b>Cardiovascular death</b>      |                           |                                             |
| Controls (n=123)                 | 14 (11.4)                 | 4.3 (2.4-7.2)                               |
| Polypharmacy (n=661)             | 78 (11.8)                 | 4.0 (3.2-5.0)                               |
| Hyperpolypharmacy (n=632)        | 82 (13.0)                 | 4.2 (3.3-5.2)                               |
| Super hyperpolypharmacy (n=345)  | 49 (14.2)                 | 4.8 (3.5-6.3)                               |
| <b>All-cause death</b>           |                           |                                             |
| Controls (n=123)                 | 25 (20.3)                 | 7.7 (5.0-11.3)                              |
| Polypharmacy (n=661)             | 128 (19.4)                | 6.6 (5.5-7.8)                               |
| Hyperpolypharmacy (n=632)        | 155 (24.5)                | 8.0 (6.7-9.3)                               |
| Super hyperpolypharmacy (n=345)  | 77 (22.3)                 | 7.5 (5.9-9.4)                               |
| <b>HF Hospitalization</b>        |                           |                                             |
| Controls (n=123)                 | 8 (6.5)                   | 2.5 (1.1-5.0)                               |
| Polypharmacy (n=661)             | 112 (16.9)                | 6.3 (5.2-7.6)                               |
| Hyperpolypharmacy (n=632)        | 166 (26.3)                | 10.0 (8.6-11.7)                             |
| Super hyperpolypharmacy (n=345)  | 113 (32.8)                | 13.7 (11.3-16.5)                            |
| <b>All-cause Hospitalization</b> |                           |                                             |
| Controls (n=123)                 | 42 (34.1)                 | 15.6 (11.3-21.1)                            |
| Polypharmacy (n=661)             | 356 (53.9)                | 28.0 (25.2-31.1)                            |
| Hyperpolypharmacy (n=632)        | 403 (63.8)                | 36.8 (33.3-40.5)                            |
| Super hyperpolypharmacy (n=345)  | 258 (74.8)                | 53.3 (47.0-60.2)                            |
| <b>Myocardial infarction</b>     |                           |                                             |
| Controls (n=123)                 | 3 (2.4)                   | 0.9 (0.2-2.7)                               |
| Polypharmacy (n=661)             | 30 (4.5)                  | 1.6 (1.1-2.3)                               |
| Hyperpolypharmacy (n=632)        | 31 (4.9)                  | 1.7 (1.1-2.3)                               |
| Super hyperpolypharmacy (n=345)  | 29 (8.4)                  | 3.0 (2.0-4.3)                               |
| <b>Stroke</b>                    |                           |                                             |
| Controls (n=123)                 | 3 (2.4)                   | 0.9 (0.2-2.7)                               |
| Polypharmacy (n=661)             | 31 (4.7)                  | 1.6 (1.1-2.3)                               |
| Hyperpolypharmacy (n=632)        | 24 (3.8)                  | 1.3 (0.8-1.9)                               |
| Super hyperpolypharmacy (n=345)  | 19 (5.5)                  | 1.9 (1.1-3.0)                               |

\* Primary outcome was composite of cardiovascular disease death, aborted cardiac arrest, or heart failure hospitalization

**Table S4. Adjusted HRs regarding medication burden in different EF strata.**

|                                      | <b>45 ≤ EF &lt; 55</b><br>n = 484 |          | <b>55 ≤ EF &lt; 65</b><br>n = 848 |          |                           | <b>EF ≥ 65</b><br>n = 429 |          |                           | <b>Global P for interaction</b> |
|--------------------------------------|-----------------------------------|----------|-----------------------------------|----------|---------------------------|---------------------------|----------|---------------------------|---------------------------------|
|                                      | <b>Adjusted HRs*</b>              | <b>P</b> | <b>Adjusted HRs*</b>              | <b>P</b> | <b>P for interaction†</b> | <b>Adjusted HRs*</b>      | <b>P</b> | <b>P for interaction†</b> |                                 |
| <b>All-cause death</b>               |                                   |          |                                   |          |                           |                           |          |                           | 0.46                            |
| Polypharmacy vs. Controls            | 0.95 (0.42-2.15)                  | 0.90     | 0.32 (0.17-0.61)                  | <0.001   | 0.20                      | 0.87 (0.30-2.51)          | 0.79     | 0.66                      |                                 |
| Hyperpolypharmacy vs. Controls       | 0.78 (0.33-1.84)                  | 0.58     | 0.41 (0.22-0.77)                  | 0.005    | 0.77                      | 0.68 (0.23-2.05)          | 0.50     | 0.55                      |                                 |
| Super hyperpolypharmacy vs. Controls | 0.96 (0.38-2.47)                  | 0.94     | 0.32 (0.16-0.63)                  | 0.001    | 0.49                      | 0.45 (0.13-1.55)          | 0.21     | 0.82                      |                                 |
| <b>HF hospitalization</b>            |                                   |          |                                   |          |                           |                           |          |                           | 0.08                            |
| Polypharmacy vs. Controls            | 3.03 (0.72-12.69)                 | 0.13     | 0.99 (0.38-2.55)                  | 0.98     | 0.32                      | 3.54 (0.48-26.30)         | 0.22     | 0.71                      |                                 |
| Hyperpolypharmacy vs. Controls       | 3.76 (0.88-16.05)                 | 0.07     | 1.66 (0.65-4.22)                  | 0.29     | 0.58                      | 3.59 (0.48-26.96)         | 0.21     | 0.74                      |                                 |
| Super hyperpolypharmacy vs. Controls | 2.96 (0.66-13.34)                 | 0.16     | 1.67 (0.64-4.39)                  | 0.30     | 0.98                      | 5.12 (0.66-39.54)         | 0.12     | 0.32                      |                                 |
| <b>All-cause hospitalization</b>     |                                   |          |                                   |          |                           |                           |          |                           | 0.42                            |
| Polypharmacy vs. Controls            | 1.53 (0.83-2.83)                  | 0.18     | 1.59 (0.96-2.62)                  | 0.07     | 0.71                      | 1.29 (0.70-2.38)          | 0.41     | 0.95                      |                                 |
| Hyperpolypharmacy vs. Controls       | 1.77 (0.93-3.36)                  | 0.08     | 2.14 (1.30-3.54)                  | 0.003    | 0.42                      | 1.22 (0.65-2.28)          | 0.54     | 0.86                      |                                 |
| Super hyperpolypharmacy vs. Controls | 1.95 (0.98-3.87)                  | 0.06     | 2.67 (1.58-4.49)                  | <0.001   | 0.28                      | 1.96 (1.00-3.83)          | 0.05     | 0.48                      |                                 |

EF = ejection fraction; HF = heart failure; HRs = hazard ratios; CIs = confidence intervals.

\*Adjusted for age, sex, race, diastolic blood pressure, smoking status, New York Heart Association functional class, hemoglobin, serum creatinine, history of HF hospitalization, arterial disease, diabetes mellitus, chronic obstructive pulmonary disease.

† Using group of 45≤EF<55 as reference.

**Table S5. Predictors of using  $\geq 5$  medications,  $\geq 10$  medications and  $\geq 15$  medications in univariable models.**

|                              | $\geq 5$ medications |                | $\geq 10$ medications |                | $\geq 15$ medications |                |
|------------------------------|----------------------|----------------|-----------------------|----------------|-----------------------|----------------|
|                              | RRs (95% CIs)        | <i>P</i> value | RRs (95% CIs)         | <i>P</i> value | RRs (95% CIs)         | <i>P</i> value |
| Female                       | -                    | -              | 0.92 (0.84-1.00)      | 0.043          | -                     | -              |
| DBP <80 mmHg                 | 1.09 (1.05-1.13)     | <0.001         | 1.38 (1.24-1.54)      | <0.001         | 1.80 (1.40-2.32)      | <0.001         |
| Heart Rate, beats/min *      | 0.98 (0.97-0.99)     | 0.001          | -                     | -              | -                     | -              |
| BMI, kg/m <sup>2</sup>       | 1.002 (1.001-1.002)  | <0.001         | 1.01 (1.01-1.02)      | <0.001         | 1.02 (1.01-1.03)      | <0.001         |
| Waist circumference, cm *    | 1.009 (1.008-1.011)  | <0.001         | 1.08 (1.08-1.09)      | <0.001         | 1.15 (1.10-1.21)      | <0.001         |
| Smoking status               |                      |                |                       |                |                       |                |
| Never vs. Ever               | 1.05 (1.03-1.08)     | <0.001         | 1.25 (1.15-1.37)      | <0.001         | 1.43 (1.15-1.76)      | <0.001         |
| NYHA functional class        |                      |                |                       |                |                       |                |
| I & II vs. III & IV          | 1.05 (1.02-1.07)     | <0.001         | 1.32 (1.22-1.43)      | <0.001         | 1.62 (1.33-1.96)      | <0.001         |
| KCCQ Scores                  |                      |                |                       |                |                       |                |
| Self-efficacy score *        | 1.006 (1.001-1.012)  | 0.027          | 1.03 (1.01-1.05)      | 0.002          | -                     | -              |
| Quality of life score *      | -                    | -              | 0.98 (0.96-0.99)      | 0.002          | 0.92 (0.89-0.96)      | <0.001         |
| Social limitation score *    | -                    | -              | 0.97 (0.96-0.99)      | <0.001         | 0.93 (0.90-0.96)      | <0.001         |
| Laboratory values            |                      |                |                       |                |                       |                |
| Anemia†                      | 1.06 (1.03-1.08)     | <0.001         | 1.32 (1.21-1.42)      | <0.001         | 1.66 (1.38-2.01)      | <0.001         |
| Serum K <sup>+</sup> , mg/dl | -                    | -              | 0.88 (0.80-0.97)      | 0.009          | 0.76 (0.61-0.95)      | 0.017          |
| ALP, U/L *                   | 0.993 (0.990-0.996)  | <0.001         | 0.97 (0.96-0.98)      | <0.001         | 0.96 (0.94-0.99)      | 0.002          |
| Serum creatinine, mg/dl      | 1.04 (1.03-1.05)     | <0.001         | 1.40 (1.36-1.43)      | <0.001         | 1.95 (1.54-2.46)      | <0.001         |
| eGFR, ml/min *               | 0.984 (0.979-0.990)  | <0.001         | 0.94 (0.92-0.96)      | <0.001         | 0.90 (0.85-0.95)      | <0.001         |
| Comorbidities                |                      |                |                       |                |                       |                |
| Previous HF hospitalization  |                      |                | -                     | -              | 1.29 (1.05-1.59)      | 0.014          |
| Previous stroke              | 1.07 (1.04-1.09)     | <0.001         | 1.28 (1.14-1.44)      | <0.001         | 1.51 (1.15-1.99)      | 0.003          |
| Previous MI                  | 1.08 (1.06-1.10)     | <0.001         | 1.40 (1.29-1.53)      | <0.001         | 1.50 (1.21-1.85)      | <0.001         |
| CABG                         | 1.08 (1.06-1.10)     | <0.001         | 1.51 (1.40-1.64)      | <0.001         | 1.85 (1.52-2.27)      | <0.001         |
| PCI                          | 1.07 (1.05-1.09)     | <0.001         | 1.49 (1.37-1.61)      | <0.001         | 1.85 (1.52-2.26)      | <0.001         |
| Angina pectoris              | 1.08 (1.06-1.10)     | <0.001         | 1.47 (1.36-1.59)      | <0.001         | 2.21 (1.83-2.67)      | <0.001         |
| ICD                          | -                    | -              | 1.41 (1.18-1.67)      | <0.001         | -                     | -              |

|                         |                  |        |                  |        |                  |        |
|-------------------------|------------------|--------|------------------|--------|------------------|--------|
| Pacemaker               | -                | -      | 1.20 (1.08-1.34) | <0.001 | -                | -      |
| Hypertension            | 1.09 (1.02-1.15) | 0.008  | 1.31 (1.10-1.56) | 0.003  | 1.82 (1.18-2.81) | 0.007  |
| Dyslipidemia            | 1.13 (1.09-1.18) | <0.001 | 1.82 (1.60-2.06) | <0.001 | 2.15 (1.63-2.83) | <0.001 |
| PAD                     | 1.06 (1.04-1.09) | <0.001 | 1.37 (1.25-1.51) | <0.001 | 1.66 (1.30-2.10) | <0.001 |
| COPD                    | 1.07 (1.05-1.10) | <0.001 | 1.34 (1.22-1.47) | <0.001 | 2.09 (1.71-2.55) | <0.001 |
| Asthma                  | 1.05 (1.03-1.08) | <0.001 | 1.47 (1.34-1.61) | <0.001 | 1.93 (1.54-2.42) | <0.001 |
| Diabetes mellitus       | 1.09 (1.06-1.12) | <0.001 | 1.65 (1.52-1.80) | <0.001 | 2.24 (1.83-2.75) | <0.001 |
| Thyroid diseases        | 1.07 (1.05-1.10) | <0.001 | 1.34 (1.23-1.46) | <0.001 | 1.37 (1.10-1.70) | 0.006  |
| Number of comorbidities | 1.01 (1.01-1.02) | <0.001 | 1.12 (1.11-1.12) | <0.001 | 1.37 (1.34-1.40) | <0.001 |

\* Calculated by per 10 units increase.

† Anemia is defined as hemoglobin (Hb) levels <12.0 g/dL in women and <13.0 g/dL in men.

TOPCAT (Treatment of Preserved Cardiac Function Heart Failure With an Aldosterone Antagonist Trial); DBP = diastolic blood pressure; BMI = body mass index; NYHA = New York Heart Association; KCCQ = the Kansas City Cardiomyopathy Questionnaire; ALP = alkaline phosphatase; HF = heart failure; eGFR = estimated glomerular filtration rate; MI = myocardial infarction; PCI = percutaneous coronary intervention; ICD = implanted cardioverter defibrillator; CABG = coronary artery bypass grafting; PAD = peripheral arterial disease; COPD = chronic obstructive pulmonary disease; RRs = Risk Ratios; CIs = confidence intervals.

**Table S6. Dosage of drugs by total medication burden at baseline**

|                          | Controls      | Polypharmacy     | Hyperpolypharmacy | Super hyperpolypharmacy | P value |
|--------------------------|---------------|------------------|-------------------|-------------------------|---------|
| ENALAPRIL, mg            | 10 (10-20)    | 20 (10-30)       | 20 (20-40)        | 20 (20-40)              | 0.003   |
| LISINOPRIL, mg           | 10 (5-12.5)   | 20 (10-40)       | 20 (10-40)        | 20 (10-40)              | 0.259   |
| RAMIPRIL, mg             | 7.5 (4.2-10)  | 7.5 (5-10)       | 10 (8.8-10)       | 10 (10-15.5)            | 0.131   |
| LOSARTAN, mg             | 50 (50-100)   | 100 (50-100)     | 100 (50-100)      | 100 (50-100)            | 0.785   |
| VALSARTAN, mg            | 320 (160-320) | 160 (80-320)     | 160 (100-320)     | 160 (160-320)           | 0.758   |
| CARVEDILOL, mg           | 12.5 (7.2-25) | 25 (12.5-42.5)   | 25 (25-50)        | 50 (14.4-50)            | <0.001  |
| METOPROLOL.SUCCINATE, mg | 50 (37.5-50)  | 50 (50-100)      | 75 (50-150)       | 100 (50-100)            | 0.446   |
| METOPROLOL.TARTRATE, mg  | 50 (50-100)   | 100 (50-175)     | 100 (50-100)      | 100 (50-150)            | 0.761   |
| ATENOLOL, mg             | 50 (50-50)    | 50 (25-100)      | 50 (25-100)       | 50 (25-100)             | 0.955   |
| FUROSEMIDE, mg           | 40 (40-40)    | 40 (40-80)       | 40 (40-80)        | 80 (40-100)             | <0.001  |
| HYDROCHLOROTHIAZIDE, mg  | 25 (25-25)    | 25 (12.5-25)     | 25 (12.5-25)      | 25 (12.5-25)            | 0.325   |
| AMLODIPINE.BESYLATE, mg  | 10 (10-10)    | 10 (5-10)        | 10 (5-10)         | 10 (5-10)               | 0.382   |
| HYDRALAZINE, mg          | 200 (200-200) | 131 (75-206.2)   | 75 (50-150)       | 150 (75-225)            | 0.111   |
| ASPIRIN, mg              | 100 (81-100)  | 81 (81-100)      | 81 (81-81)        | 81 (81-81)              | <0.001  |
| CLOPIDOGREL, mg          | 75 (75-75)    | 75 (75-75)       | 75 (75-75)        | 75 (75-75)              | 0.766   |
| SIMVASTATIN, mg          | 30 (20-40)    | 20 (20-40)       | 40 (20-40)        | 40 (20-40)              | 0.004   |
| LIPITOR, mg              | 20 (20-80)    | 20 (10-40)       | 20 (20-40)        | 40 (10-50)              | 0.139   |
| CRESTOR, mg              | 5 (5-5)       | 10 (10-20)       | 10 (10-20)        | 10 (8.8-20)             | 0.246   |
| WARFARIN, mg             | 5 (3.2-6.2)   | 5 (2.5-5)        | 5 (3-5)           | 5 (3-5)                 | 0.901   |
| DIGOXIN, mg              | 0.2 (0.2-0.2) | 0.2 (0.1-0.2)    | 0.1 (0.1-0.2)     | 0.1 (0.1-0.2)           | 0.615   |
| IMDUR, mg                | -             | 30 (30-37.5)     | 60 (30-60)        | 60 (30-97.5)            | 0.19    |
| METFORMIN, g             | 1 (0.8-1.8)   | 1 (0.8-1.7)      | 1.5 (1-2)         | 1.3 (1-2)               | 0.02    |
| GLIPIZIDE, mg            | -             | 5 (5-10)         | 10 (5-15)         | 20 (10-20)              | 0.058   |
| LANTUS, iu               | 25 (25-25)    | 41.5 (32.2-52.5) | 40 (26.2-59)      | 42.5 (25.8-95)          | 0.513   |

Values are median (interquartile range).
